# Supplementary material for: A U.S. Pharmacopeia (USP) overview of Pan American botanicals used in dietary supplements and herbal medicines
Source: PubMed Central journal article supplement (PMC11392873; doi:10.3389/fphar.2024.1426210), 2024-08-30
Supplement: Table1.pdf [file Table1.pdf]

**Table 1.** Historical timeline summarizing main milestones in the use of herbal medicines in the Pan Am region

| Year/period                  | Milestone                                                                                                                                                                                                                                                                                                                                                                                                                                                                     |
|------------------------------|-------------------------------------------------------------------------------------------------------------------------------------------------------------------------------------------------------------------------------------------------------------------------------------------------------------------------------------------------------------------------------------------------------------------------------------------------------------------------------|
| Pre-colonization             | Unrecorded use due to a predominantly oral history                                                                                                                                                                                                                                                                                                                                                                                                                            |
| Colonization:<br>1552 & 1574 | <i>Libellus de Medicinalibus Indorum Herbis</i> ( <i>Book of Medicinal Herbs of the Indies</i> also known as the <i>Badianus Manuscript</i> ); <i>La historia medicinal de las cosas que se traen de nuestras Indias Occidentales</i> ( <i>The medicinal history of the things that are brought from our West Indies</i> ) by Spanish physician and botanist Nicholas Monardes (1574), translated by John Frampton (1596) as <i>Joyfull Newes out of the New-Found Worlde</i> |
| 1587                         | In Brazil, the first description of the use of plants as medicine is made by Gabriel Soares de Souza.                                                                                                                                                                                                                                                                                                                                                                         |
| Post- colonization:<br>1651  | <i>Rerum Medicarum Novae Hispaniae thesaurus seu plantarum, animalium, mineralium, Mexicanorum historia</i> ( <i>Inventory of medical items from New Spain, or, History of Mexican plants, animals and minerals</i> ) published by Spanish ethnographer Francisco Hernández                                                                                                                                                                                                   |
| 1846                         | Publication of the first <i>Mexican Pharmacopoeia</i>                                                                                                                                                                                                                                                                                                                                                                                                                         |
| 1882                         | Publication of the first <i>Chilean Pharmacopoeia</i> that is dominated by plant ingredients.                                                                                                                                                                                                                                                                                                                                                                                 |
| 18 <sup>th</sup> century     | Cataloguing of Argentine herb use begins by Jesuits Pedro Montenegro and Segismundo Asperger                                                                                                                                                                                                                                                                                                                                                                                  |
| 1900                         | In Argentina, Dr. Juan A. Dominguez establishes a museum (Museum of Pharmacobotany) containing plant and herbarium specimens creating a foundation for traditional herb use in the region (79).                                                                                                                                                                                                                                                                               |
| 1982                         | TRAMIL (Traditional Medicines in the Islands) initiative was established to help provide high-quality primary care to those who live within the Caribbean basin, leveraging the existing cultural use of medicinal plants, which is endemic throughout the region (32) and leading to the development of the <i>Caribbean Herbal Pharmacopoeia</i> . Approximately 90 plants approved throughout the region for use in national health care systems ((35, 36).                |
| 1994                         | Enactment of the Dietary Supplement Health and Education Act in the US that classifies herbal ingredients as a category of food and defines them as 'dietary supplements'.                                                                                                                                                                                                                                                                                                    |
| 1998                         | In the Ngawbere territory of Chile, a variety of traditional healers are formally trained as herbalists or health assistants to provide care to indigenous communities (96).                                                                                                                                                                                                                                                                                                  |
| 2000                         | Publication of the <i>Herbal Pharmacopeia of the United Mexican States</i>                                                                                                                                                                                                                                                                                                                                                                                                    |
| 1993-2016                    | Market surveys report approximately up to 150 herbs commonly sold in Mexican markets                                                                                                                                                                                                                                                                                                                                                                                          |
| 2001-2023                    | In Mexico, it is reported that approximately 80–90% of the population utilizes some form of traditional herbal medicine and an estimated 50,000 shops sell herbal products; (18, 25, 26). 54% of health professionals and 49% of physicians reportedly used medicinal plants as an alternative therapy for several diseases                                                                                                                                                   |
| 2002                         | The traditional Mapuche community of Chile assumes administration of the Maquehue Hospital and Health Centers of Boroa Filulawen and Ñi Lawentuwün in Araucanía Region to promote the use of traditional medical practices (94).                                                                                                                                                                                                                                              |
| 2004                         | Canada's Natural Health Products Regulations come into force, with guidance documents on standards for quality, safety and efficacy; and the first entries for their Compendium of Monographs - Natural Health Products are published                                                                                                                                                                                                                                         |
| 2006 & 2012                  | Approval of first two 'botanical drugs'; Veregen® (green tea sinecatechins) and Mytesi®, an extract prepared from latex of dragon's blood ( <i>Croton lechleri</i> ) (6).                                                                                                                                                                                                                                                                                                     |
| 2008                         | In Columbia, the <i>Colombian Vademecum of Medicinal Plants</i> containing 115 plant remedies is published (110, 111).                                                                                                                                                                                                                                                                                                                                                        |
| 2015                         | Market vendors in Brazil report the medicinal use of 91 species of plants for 291 indications (108)                                                                                                                                                                                                                                                                                                                                                                           |
| 2009-2019                    | In Puerto Rico, medicinal plant use surveys record 118 plants as used in to treat a variety of conditions, Surveys of medicinal plant use conducted in Guatemala National                                                                                                                                                                                                                                                                                                     |

|      |                                                                                                                                                                                                                                                                                                                                                            |
|------|------------------------------------------------------------------------------------------------------------------------------------------------------------------------------------------------------------------------------------------------------------------------------------------------------------------------------------------------------------|
|      | with subsequent development of Vademecum of Medicinal Plants of Guatemala, and a Central American Medicinal Plants Vademecum that includes 150 medicinal plants that are traditionally used and commercially available in Central America. In Argentina, more than 1,600 plants recorded as used medicinally (68, 70, 71).                                 |
| 2022 | USP launches the Pan American Botanical Dietary Supplements and Herbal Medicines (BDSHM) Expert Panel to support the development of quality control standards throughout Latin America. In Chile, a <b>native plant</b> medicines database, <i>Rizoma Database</i> , is launched and presents information regarding the use of 736 species of plants (97). |
